# Supplementary material for: Learning and interpreting the gene regulatory grammar in a deep learning framework
Source: PubMed Central journal article supplement (PMC7660921; doi:10.1371/journal.pcbi.1008334), 2020-11-02

**a**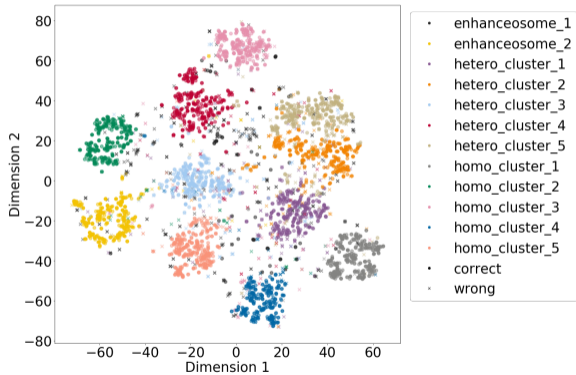**b**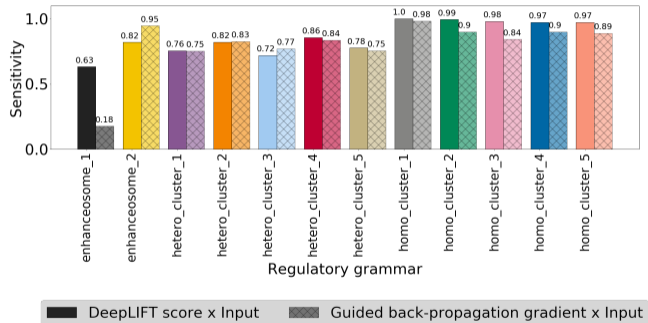

Supplement: pcbi.1008334.s002.pdf [file pcbi.1008334.s002.pdf]
