# Supplementary material for: Learning and interpreting the gene regulatory grammar in a deep learning framework
Source: PubMed Central journal article supplement (PMC7660921; doi:10.1371/journal.pcbi.1008334), 2020-11-02
Supplement: pcbi.1008334.s007.pdf [file pcbi.1008334.s007.pdf]

Table 1: Transcription factor used in constructing regulatory grammars

| TF     | logo | regulatory rammar                  |
|--------|------|------------------------------------|
| NFYA   |      | homo_cluster_1                     |
| POU3F2 |      | homo_cluster_2                     |
| TP53   |      | homo_cluster_3                     |
| ESRRA  |      | homo_cluster_4                     |
| IRF1   |      | homo_cluster_5                     |
| KLF1   |      | hetero_cluster_1                   |
| MEF2A  |      | hetero_cluster_1                   |
| YY1    |      | hetero_cluster_1, hetero_cluster_2 |
| GATA1  |      | hetero_cluster_1, enhanceosome_2   |
| RUNX3  |      | hetero_cluster_2                   |
| PDX1   |      | hetero_cluster_2                   |
| BCL11A |      | hetero_cluster_2, hetero_cluster_3 |
| E2F1   |      | hetero_cluster_3                   |
| FOXA1  |      | hetero_cluster_3                   |
| NR2F2  |      | hetero_cluster_3, hetero_cluster_4 |
| VDR    |      | hetero_cluster_4                   |
| BACH1  |      | hetero_cluster_4                   |
| FOS    |      | hetero_cluster_4, hetero_cluster_5 |
| MAFG   |      | hetero_cluster_5                   |
| ERG    |      | hetero_cluster_5                   |
| STAT5B |      | hetero_cluster_5, enhanceosome_1   |
| TCF7   |      | enhanceosome_1                     |
| MAX    |      | enhanceosome_1                     |
| LYL1   |      | enhanceosome_1, enhanceosome_2     |
| PBX1   |      | enhanceosome_2                     |
| CEBPA  |      | enhanceosome_2                     |
