# Supplementary material for: Learning and interpreting the gene regulatory grammar in a deep learning framework
Source: PubMed Central journal article supplement (PMC7660921; doi:10.1371/journal.pcbi.1008334), 2020-11-02
Supplement: pcbi.1008334.s008.pdf [file pcbi.1008334.s008.pdf]

Table 2: Simulated regulatory grammar

| type                | name             | TFs                       |
|---------------------|------------------|---------------------------|
| homotypic cluster   | homo_cluster_1   | NFYA                      |
| homotypic cluster   | homo_cluster_2   | POU3F2                    |
| homotypic cluster   | homo_cluster_3   | TP53                      |
| homotypic cluster   | homo_cluster_4   | ESRRA                     |
| homotypic cluster   | homo_cluster_5   | IRF1                      |
| heterotypic cluster | hetero_cluster_1 | KLF1, MEF2A, YY1, GATA1   |
| heterotypic cluster | hetero_cluster_2 | RUNX3, PDX1, BCL11A, YY1  |
| heterotypic cluster | hetero_cluster_3 | E2F1, FOXA, NR2F2, BCL11A |
| heterotypic cluster | hetero_cluster_4 | VDR, BACH1, FOS, NR2F2    |
| heterotypic cluster | hetero_cluster_5 | MAFG, ERG, STAT5B, FOS    |
| enhanceosome        | enhanceosome_1   | TCF7, MAX, LYL1, STAT5B   |
| enhanceosome        | enhanceosome_2   | PBX1, CEBPA, GATA1, LYL1  |
