# Supplementary material for: Learning and interpreting the gene regulatory grammar in a deep learning framework
Source: PubMed Central journal article supplement (PMC7660921; doi:10.1371/journal.pcbi.1008334), 2020-11-02
Supplement: pcbi.1008334.s009.pdf [file pcbi.1008334.s009.pdf]

Table 3: Simulated regulatory classes

| regulatory sequence class | regulatory grammars              |
|---------------------------|----------------------------------|
| regulatory_class1         | homo_cluster_1, hetero_cluster_1 |
| regulatory_class2         | hetero_cluster_1, homo_cluster_2 |
| regulatory_class3         | homo_cluster_2, hetero_cluster_2 |
| regulatory_class4         | hetero_cluster_2, homo_cluster_3 |
| regulatory_class5         | homo_cluster_3, hetero_cluster_3 |
| regulatory_class6         | hetero_cluster_3, homo_cluster_4 |
| regulatory_class7         | homo_cluster_4, hetero_cluster_4 |
| regulatory_class8         | hetero_cluster_4, homo_cluster_5 |
| regulatory_class9         | homo_cluster_5, hetero_cluster_4 |
| regulatory_class10        | hetero_cluster_5, enhanceosome_1 |
| regulatory_class11        | enhanceosome_1, enhanceosome_2   |
| regulatory_class12        | enhanceosome_2, homo_cluster_1   |
