# Supplementary material for: Learning and interpreting the gene regulatory grammar in a deep learning framework
Source: PubMed Central journal article supplement (PMC7660921; doi:10.1371/journal.pcbi.1008334), 2020-11-02
Supplement: pcbi.1008334.s010.pdf [file pcbi.1008334.s010.pdf]

Table 4: Simulated heterogenous regulatory classes

| heterogenous regulatory sequence class | regulatory classes                                       |
|----------------------------------------|----------------------------------------------------------|
| heterogenous_regulatory_class1         | regulatory_class1, regulatory_class3, regulatory_class5  |
| heterogenous_regulatory_class2         | regulatory_class2, regulatory_class4, regulatory_class6  |
| heterogenous_regulatory_class3         | regulatory_class7, regulatory_class9, regulatory_class11 |
| heterogenous_regulatory_class4         | regulatory_class5, regulatory_class8, regulatory_class10 |
| heterogenous_regulatory_class5         | regulatory_class1, regulatory_class6, regulatory_class12 |
